# Supplementary material for: Risk and protective factors for falls on stairs in young children: multicentre case–control study
Source: HighWire-hosted journal article supplement (doi:10.1136/archdischild-2015-308486), 2015-12-10
Supplement: archdischild-2015-308486supp_table.pdf [file archdischild-2015-308486supp_table.pdf]

Online table1. Significant interactions in adjusted analyses comparing cases with controls

| <b>Exposure</b>                                          | <b>Adjusted odds ratios (95% CI) by age group</b>                          |                            |                             | <b>Test for interaction</b> |
|----------------------------------------------------------|----------------------------------------------------------------------------|----------------------------|-----------------------------|-----------------------------|
|                                                          | <b>0-12 months</b>                                                         | <b>13-36 months</b>        | <b>≥37 months</b>           |                             |
| Stair gate left open <sup>a</sup>                        | 8.64 (3.99, 18.68)                                                         | 2.64 (1.92, 3.64)          | 1.52 (0.76, 3.03)           | 0.008                       |
| No stair gate <sup>a</sup>                               | 3.27 (1.48, 7.20)                                                          | 2.33 (1.60, 3.39)          | 2.08 (1.23, 3.51)           |                             |
|                                                          | <b>Adjusted odds ratios (95% CI) by use of baby walker</b>                 |                            | <b>Test for interaction</b> |                             |
|                                                          | <b>Used walker</b>                                                         | <b>Did not use walker</b>  |                             |                             |
| Stair gate left open <sup>a</sup>                        | 7.37 (4.36, 12.45)                                                         | 2.65 (1.87, 3.76)          | 0.002                       |                             |
| No stair gate <sup>a</sup>                               | 2.54 (1.33, 4.87)                                                          | 2.42 (1.63, 3.59)          |                             |                             |
|                                                          | <b>Adjusted odds ratios (95% CI) by adults in paid work</b>                |                            |                             | <b>Test for interaction</b> |
|                                                          | <b>2 or more</b>                                                           | <b>One</b>                 | <b>None</b>                 |                             |
| Not taught child rules about carrying things down stairs | 1.45 (0.94, 2.24)                                                          | 1.26 (0.76, 2.09)          | 0.44 (0.20, 0.96)           | 0.009                       |
| Not taught child rules about leaving things on stairs    | 1.01 (0.66, 1.56)                                                          | 0.88 (0.54, 1.42)          | 0.27 (0.12, 0.60)           | 0.004                       |
|                                                          | <b>Adjusted odds ratios (95% CI) by number of adults living with child</b> |                            | <b>Test for interaction</b> |                             |
|                                                          | <b>One adult</b>                                                           | <b>More than one adult</b> |                             |                             |
| Not taught children rules about leaving things on stairs | 0.33 (0.15, 0.75)                                                          | 0.95 (0.66, 1.38)          | 0.01                        |                             |
| Stairs not carpeted <sup>a</sup>                         | 11.07 (3.89, 31.53)                                                        | 1.15 (0.79, 1.66)          | <0.001                      |                             |

Adjusted for confounders in table 3. <sup>a</sup> in the last 24 hours.
